# Supplementary material for: Genetic Effects Analysis of QTLs for Rice Grain Size Based on CSSL-Z403 and Its Dissected Single and Dual-Segment Substitution Lines
Source: MDPI journal article supplement (doi:10.3390/ijms241512013), 2023-07-27
Supplement: s1 [file s1]

**Supplement data2:** Two-way ANOVA of two QTL epistatic interaction in substitution segments of each DSSL

Grain length(mm):

D1:

| Tests of Between-Subjects Effects      |                               |    |             |            |      |
|----------------------------------------|-------------------------------|----|-------------|------------|------|
| Source                                 | Type III<br>Sum of<br>Squares | df | Mean Square | F          | Sig. |
| Corrected Model                        | 4.793 <sup>a</sup>            | 3  | 1.598       | 100.259    | .000 |
| Intercept                              | 4479.572                      | 1  | 4479.572    | 281115.297 | .000 |
| <i>qGL5</i> (S1)                       | .543                          | 1  | .543        | 34.069     | .000 |
| Substitution Seg. (S2)                 | 3.721                         | 1  | 3.721       | 233.511    | .000 |
| <i>qGL5</i> (S1)×substitution seg.(S2) | .529                          | 1  | .529        | 33.197     | .000 |
| Error                                  | .574                          | 36 | .016        |            |      |
| Total                                  | 4484.939                      | 40 |             |            |      |
| Corrected Total                        | 5.367                         | 39 |             |            |      |

a. R Squared = .893 (Adjusted R Squared = .884)

D2:

| Tests of Between-Subjects Effects   |                               |    |             |            |      |
|-------------------------------------|-------------------------------|----|-------------|------------|------|
| Source                              | Type III<br>Sum of<br>Squares | df | Mean Square | F          | Sig. |
| Corrected Model                     | .807 <sup>a</sup>             | 3  | .269        | 14.932     | .000 |
| Intercept                           | 4559.293                      | 1  | 4559.293    | 253118.255 | .000 |
| <i>qGL9</i> (S3)                    | .023                          | 1  | .023        | 1.253      | .270 |
| <i>qGL12</i> (S4)                   | .378                          | 1  | .378        | 21.002     | .000 |
| <i>qGL9</i> (S3)× <i>qGL12</i> (S4) | .406                          | 1  | .406        | 22.541     | .000 |
| Error                               | .648                          | 36 | .018        |            |      |
| Total                               | 4560.748                      | 40 |             |            |      |
| Corrected Total                     | 1.455                         | 39 |             |            |      |

a. R Squared = .554 (Adjusted R Squared = .517)

Grain width(mm):

D1:

| Tests of Between-Subjects Effects  |                               |    |                |            |      |
|------------------------------------|-------------------------------|----|----------------|------------|------|
| Source                             | Type III<br>Sum of<br>Squares | df | Mean<br>Square | F          | Sig. |
| Corrected Model                    | 2.355 <sup>a</sup>            | 3  | .785           | 189.367    | .000 |
| Intercept                          | 445.623                       | 1  | 445.623        | 107486.955 | .000 |
| <i>qGW5</i> (S1)                   | 1.250                         | 1  | 1.250          | 301.416    | .000 |
| <i>qGW7</i> (S2)                   | .013                          | 1  | .013           | 3.213      | .081 |
| <i>qGW5</i> (S1)× <i>qGW7</i> (S2) | 1.092                         | 1  | 1.092          | 263.470    | .000 |
| Error                              | .149                          | 36 | .004           |            |      |
| Total                              | 448.127                       | 40 |                |            |      |
| Corrected Total                    | 2.504                         | 39 |                |            |      |

a. R Squared = .940 (Adjusted R Squared = .935)

D2:

| Tests of Between-Subjects Effects   |                               |    |                |            |      |
|-------------------------------------|-------------------------------|----|----------------|------------|------|
| Source                              | Type III<br>Sum of<br>Squares | df | Mean<br>Square | F          | Sig. |
| Corrected Model                     | 8.540 <sup>a</sup>            | 3  | 2.847          | 669.731    | .000 |
| Intercept                           | 515.883                       | 1  | 515.883        | 121376.317 | .000 |
| <i>qGW9</i> (S3)                    | 5.439                         | 1  | 5.439          | 1279.696   | .000 |
| <i>qGW12</i> (S4)                   | .158                          | 1  | .158           | 37.057     | .000 |
| <i>qGW9</i> (S3)× <i>qGW12</i> (S4) | 2.943                         | 1  | 2.943          | 692.440    | .000 |
| Error                               | .153                          | 36 | .004           |            |      |
| Total                               | 524.576                       | 40 |                |            |      |
| Corrected Total                     | 8.693                         | 39 |                |            |      |

a. R Squared = .982 (Adjusted R Squared = .981)

1000-grain weight (g):

D1:

| Tests of Between-Subjects Effects    |                               |    |                |            |      |
|--------------------------------------|-------------------------------|----|----------------|------------|------|
| Source                               | Type III<br>Sum of<br>Squares | df | Mean<br>Square | F          | Sig. |
| Corrected Model                      | 507.330 <sup>a</sup>          | 3  | 169.110        | 604.133    | .000 |
| Intercept                            | 36302.576                     | 1  | 36302.576      | 129688.342 | .000 |
| <i>qGWT5</i> (S1)                    | 449.124                       | 1  | 449.124        | 1604.462   | .000 |
| <i>qGWT7</i> (S2)                    | 15.863                        | 1  | 15.863         | 56.670     | .000 |
| <i>qGWT5</i> (S1)× <i>qGWT7</i> (S2) | 35.855                        | 1  | 35.855         | 128.088    | .000 |
| Error                                | 8.678                         | 31 | .280           |            |      |
| Total                                | 38882.220                     | 35 |                |            |      |
| Corrected Total                      | 516.007                       | 34 |                |            |      |

a. R Squared = .983 (Adjusted R Squared = .982)

D2:

| Tests of Between-Subjects Effects           |                               |    |                |           |      |
|---------------------------------------------|-------------------------------|----|----------------|-----------|------|
| Source                                      | Type III<br>Sum of<br>Squares | df | Mean<br>Square | F         | Sig. |
| Corrected Model                             | 286.159 <sup>a</sup>          | 3  | 95.386         | 102.155   | .000 |
| Intercept                                   | 31565.256                     | 1  | 31565.256      | 33805.256 | .000 |
| <i>qGWT9</i> (S3)                           | 96.528                        | 1  | 96.528         | 103.378   | .000 |
| Substitution Seg. (S4)                      | 76.557                        | 1  | 76.557         | 81.990    | .000 |
| <i>qGWT9</i> (S3)× substitution<br>seg.(S4) | 85.676                        | 1  | 85.676         | 91.756    | .000 |
| Error                                       | 28.946                        | 31 | .934           |           |      |
| Total                                       | 33137.908                     | 35 |                |           |      |
| Corrected Total                             | 315.105                       | 34 |                |           |      |

a. R Squared = .908 (Adjusted R Squared = .899)

Ratio of length to width:

D1:

| Tests of Between-Subjects Effects    |                               |    |                |           |      |
|--------------------------------------|-------------------------------|----|----------------|-----------|------|
| Source                               | Type III<br>Sum of<br>Squares | df | Mean<br>Square | F         | Sig. |
| Corrected Model                      | 1.707 <sup>a</sup>            | 3  | .569           | 113.274   | .000 |
| Intercept                            | 405.833                       | 1  | 405.833        | 80776.123 | .000 |
| <i>qRLW5</i> (S1)                    | .754                          | 1  | .754           | 149.976   | .000 |
| <i>qRLW7</i> (S2)                    | .301                          | 1  | .301           | 59.915    | .000 |
| <i>qRLW5</i> (S1)× <i>qRLW7</i> (S2) | .653                          | 1  | .653           | 129.932   | .000 |
| Error                                | .181                          | 36 | .005           |           |      |
| Total                                | 407.721                       | 40 |                |           |      |
| Corrected Total                      | 1.888                         | 39 |                |           |      |

a. R Squared = .904 (Adjusted R Squared = .896)

D2:

| Tests of Between-Subjects Effects     |                               |    |                |            |      |
|---------------------------------------|-------------------------------|----|----------------|------------|------|
| Source                                | Type III<br>Sum of<br>Squares | df | Mean<br>Square | F          | Sig. |
| Corrected Model                       | 6.030 <sup>a</sup>            | 3  | 2.010          | 647.730    | .000 |
| Intercept                             | 365.723                       | 1  | 365.723        | 117858.851 | .000 |
| <i>qRLW9</i> (S3)                     | 3.534                         | 1  | 3.534          | 1138.975   | .000 |
| <i>qRLW12</i> (S4)                    | .040                          | 1  | .040           | 12.994     | .001 |
| <i>qRLW9</i> (S3)× <i>qRLW12</i> (S4) | 2.455                         | 1  | 2.455          | 791.221    | .000 |
| Error                                 | .112                          | 36 | .003           |            |      |
| Total                                 | 371.864                       | 40 |                |            |      |
| Corrected Total                       | 6.142                         | 39 |                |            |      |

a. R Squared = .982 (Adjusted R Squared = .980)
