# Supplementary material for: Genetic Effects Analysis of QTLs for Rice Grain Size Based on CSSL-Z403 and Its Dissected Single and Dual-Segment Substitution Lines
Source: MDPI journal article supplement (doi:10.3390/ijms241512013), 2023-07-27
Supplement: s1 [file s1]

Supplement data 1: One-way ANOVA and LSD multiple comparison for 4 traits between Xihui18 and S1-S4

Grain length(mm):

| ANOVA          |                |    |             |        |      |
|----------------|----------------|----|-------------|--------|------|
|                | Sum of Squares | df | Mean Square | F      | Sig. |
| Between Groups | 5.767          | 6  | .961        | 54.192 | .000 |
| Within Groups  | 1.117          | 63 | .018        |        |      |
| Total          | 6.885          | 69 |             |        |      |

| Multiple Comparisons |         |              |                       |            |      |                         |             |
|----------------------|---------|--------------|-----------------------|------------|------|-------------------------|-------------|
| (I) VAR00001         |         | (J) VAR00001 | Mean Difference (I-J) | Std. Error | Sig. | 95% Confidence Interval |             |
|                      |         |              |                       |            |      | Lower Bound             | Upper Bound |
| LSD                  | Xihui18 | S1           | .15400*               | .05956     | .012 | .0350                   | .2730       |
|                      |         | S2           | .00711                | .05956     | .905 | -.1119                  | .1261       |
|                      |         | S3           | -.46300*              | .05956     | .000 | -.5820                  | -.3440      |
|                      |         | S4           | .38000*               | .05956     | .000 | .2610                   | .4990       |
|                      |         | D2           | -.24200*              | .05956     | .000 | -.3610                  | -.1230      |
|                      |         | D1           | .37700*               | .05956     | .000 | .2580                   | .4960       |

Grain width(mm):

| ANOVA          |                |    |             |         |      |
|----------------|----------------|----|-------------|---------|------|
|                | Sum of Squares | df | Mean Square | F       | Sig. |
| Between Groups | 9.860          | 6  | 1.643       | 353.580 | .000 |
| Within Groups  | .293           | 63 | .005        |         |      |
| Total          | 10.153         | 69 |             |         |      |

| Multiple Comparisons |         |              |                       |            |      |                         |             |
|----------------------|---------|--------------|-----------------------|------------|------|-------------------------|-------------|
| (I) VAR00001         |         | (J) VAR00001 | Mean Difference (I-J) | Std. Error | Sig. | 95% Confidence Interval |             |
|                      |         |              |                       |            |      | Lower Bound             | Upper Bound |
| LSD                  | Xihui18 | S1           | -1.28000*             | .03049     | .000 | -1.3409                 | -1.2191     |
|                      |         | S2           | -.41711*              | .03049     | .000 | -.4780                  | -.3562      |
|                      |         | S3           | -.68400*              | .03049     | .000 | -.7449                  | -.6231      |
|                      |         | S4           | -.29400*              | .03049     | .000 | -.3549                  | -.2331      |
|                      |         | D1           | -.61200*              | .03049     | .000 | -.6729                  | -.5511      |
|                      |         | D2           | -.31700*              | .03049     | .000 | -.3779                  | -.2561      |

1000-grain weight (g):

| ANOVA          |                |    |             |         |      |
|----------------|----------------|----|-------------|---------|------|
|                | Sum of Squares | df | Mean Square | F       | Sig. |
| Between Groups | 820.332        | 6  | 136.722     | 204.812 | .000 |
| Within Groups  | 37.383         | 56 | .668        |         |      |
| Total          | 857.715        | 62 |             |         |      |

| Multiple Comparisons |         |              |                       |            |      |                         |             |
|----------------------|---------|--------------|-----------------------|------------|------|-------------------------|-------------|
| (I) VAR00001         |         | (J) VAR00001 | Mean Difference (I-J) | Std. Error | Sig. | 95% Confidence Interval |             |
|                      |         |              |                       |            |      | Lower Bound             | Upper Bound |
| LSD                  | Xihui18 | S1           | -9.296*               | .403       | .000 | -10.10                  | -8.49       |
|                      |         | S2           | -.686                 | .423       | .111 | -1.53                   | .16         |
|                      |         | S3           | -6.526*               | .403       | .000 | -7.33                   | -5.72       |
|                      |         | S4           | -.173                 | .423       | .684 | -1.02                   | .67         |
|                      |         | D1           | -5.908*               | .403       | .000 | -6.71                   | -5.10       |
|                      |         | D2           | -.368                 | .403       | .365 | -1.17                   | .44         |

Ratio of length to width:

| ANOVA          |                |    |             |         |      |
|----------------|----------------|----|-------------|---------|------|
|                | Sum of Squares | df | Mean Square | F       | Sig. |
| Between Groups | 6.107          | 6  | 1.018       | 245.058 | .000 |
| Within Groups  | .262           | 63 | .004        |         |      |
| Total          | 6.369          | 69 |             |         |      |

| Multiple Comparisons |         |              |                       |            |      |                         |             |
|----------------------|---------|--------------|-----------------------|------------|------|-------------------------|-------------|
| (I) VAR00003         |         | (J) VAR00003 | Mean Difference (I-J) | Std. Error | Sig. | 95% Confidence Interval |             |
|                      |         |              |                       |            |      | Lower Bound             | Upper Bound |
| LSD                  | Xihui18 | S1           | 1.08883*              | .02882     | .000 | 1.0312                  | 1.1464      |
|                      |         | S2           | .43191*               | .02882     | .000 | .3743                   | .4895       |
|                      |         | S3           | .52890*               | .02882     | .000 | .4713                   | .5865       |
|                      |         | S4           | .42783*               | .02882     | .000 | .3702                   | .4854       |
|                      |         | D1           | .53041*               | .02882     | .000 | .4728                   | .5880       |
|                      |         | D2           | .44843*               | .02882     | .000 | .3908                   | .5060       |
